# Supplementary material for: Endogenous GIP ameliorates impairment of insulin secretion in proglucagon-deficient mice under moderate beta cell damage induced by streptozotocin
Source: Springer Nature journal article supplement (doi:10.1007/s00125-016-3935-2), 2016-04-06
Supplement: MOESM1 [file 10017764]

## Electronic Supplemental Material

ESM Fig. 1

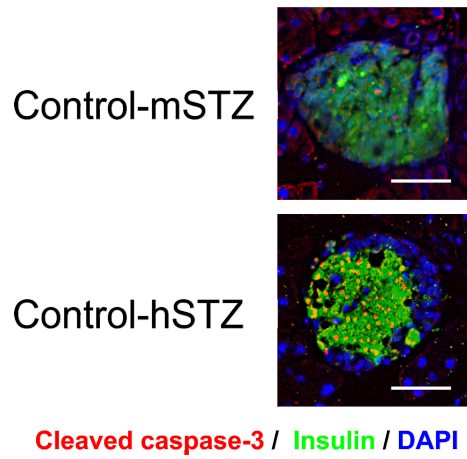

*Cleaved caspase-3 expression in islets of hSTZ- and mSTZ-treated control mice.*

Fluorescent images of islets from mSTZ-treated and hSTZ-treated control mice. Cleaved caspase-3, red; insulin, green; DAPI, blue. Scale bars, 50  $\mu\text{m}$ .

ESM Fig. 2

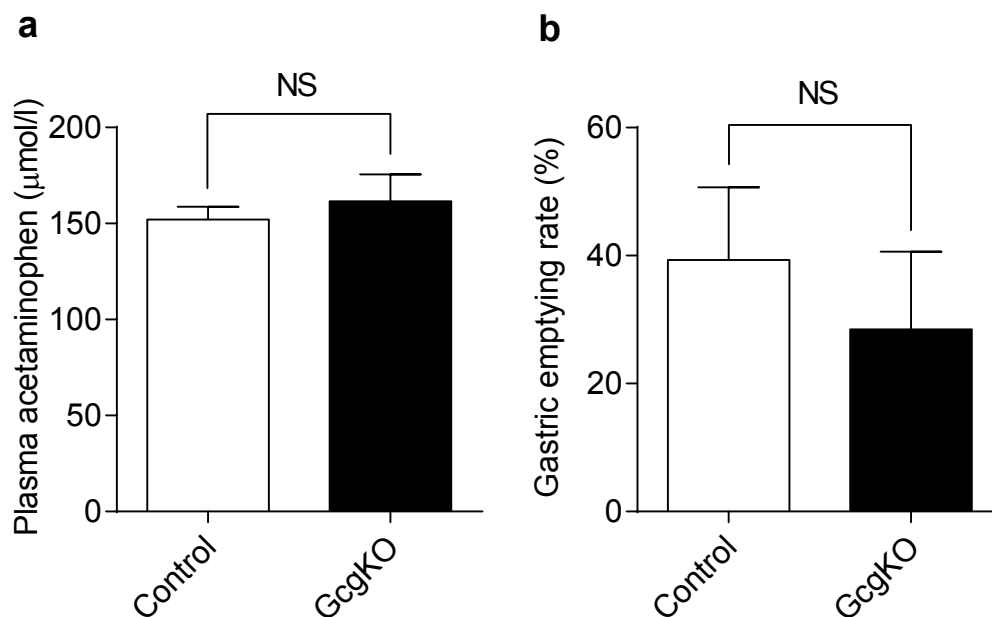

Liquid (a) and solid (b) phase of gastric emptying in control and GcgKO mice.

Acetaminophen absorption test for assessing liquid-phase gastric emptying and evaluation of gastric emptying rate for assessing solid-phase gastric emptying were carried out as previously described [Reference: Ali S, Lamont BJ, Charron MJ, et al. (2011) Dual elimination of the glucagon and GLP-1 receptors in mice reveals plasticity in the incretin axis. *J Clin Invest* 121:1917–1929]. (a) Distilled water containing 100 mg/kg BW (662 µmol/kg) acetaminophen was given orally after overnight (16 hours) fast. Plasma acetaminophen was measured at 15 minutes in control and GcgKO mice. (b) Mice were given a standard chow for two hours after overnight (16 hours) fast. NS, not significant. White bars, control mice; black bars, GcgKO mice.  $n=4$  per group.

ESM Fig. 3

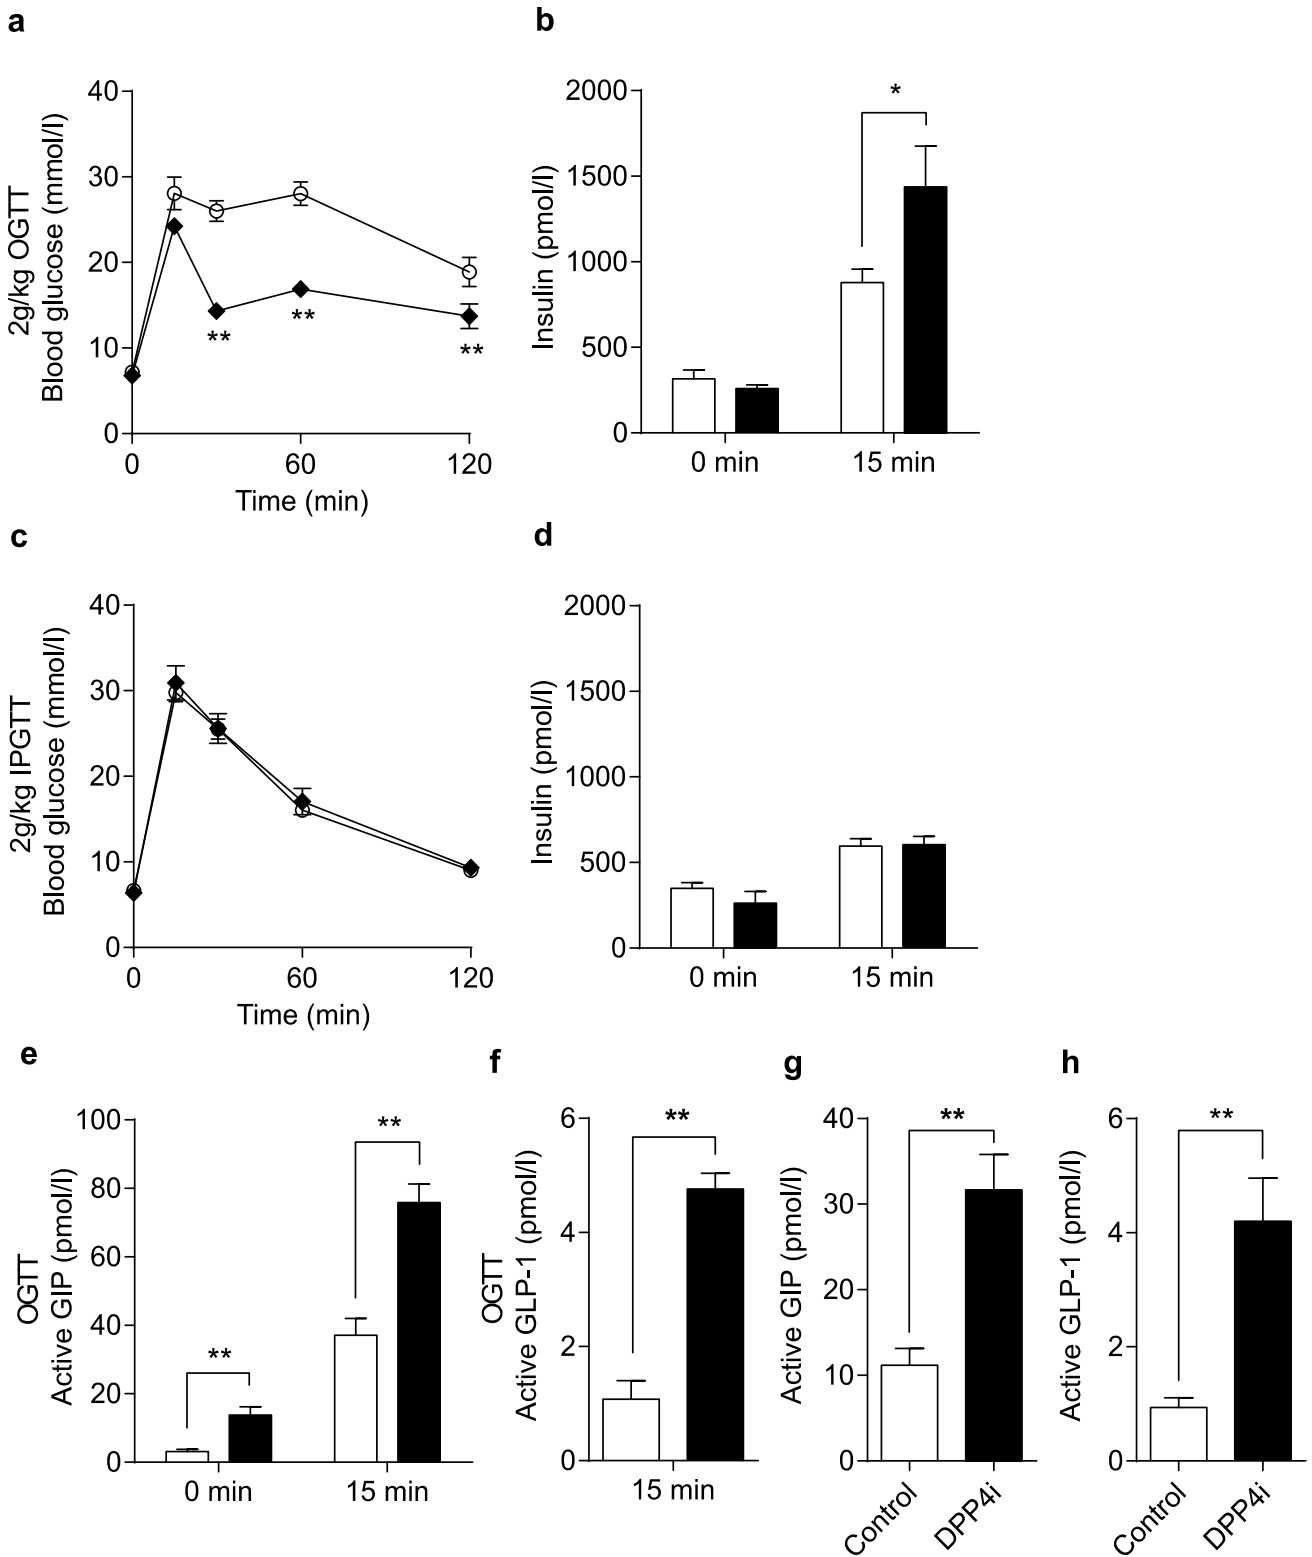

Active GIP and GLP-1 levels during IPGTT, and OGTT in DPP4 inhibitor-treated wild type mice

DPP4 inhibitor treatment was performed in the same dose as mSTZ-DPP4i mice in Figure 4.

OGTT (**a, b**) and IPGTT (**c, d**) were performed at 4 and 6 weeks, respectively. 2g/kg BW glucose was administered orally or intraperitoneally after 16-hour fast. Plasma active GIP and GLP-1 levels were measured at 0 and/or 15 minutes (**e, f**). Plasma active GIP and GLP-1 levels in mice fed *ad libitum* condition (**g, h**). White circles and solid line, non-treated wild type mice (control); black diamonds and solid line, DPP4 inhibitor-treated wild type mice (DPP4i). White bars, control; black bars, DPP4i.  $n=6-7$  per group.

ESM Fig. 4

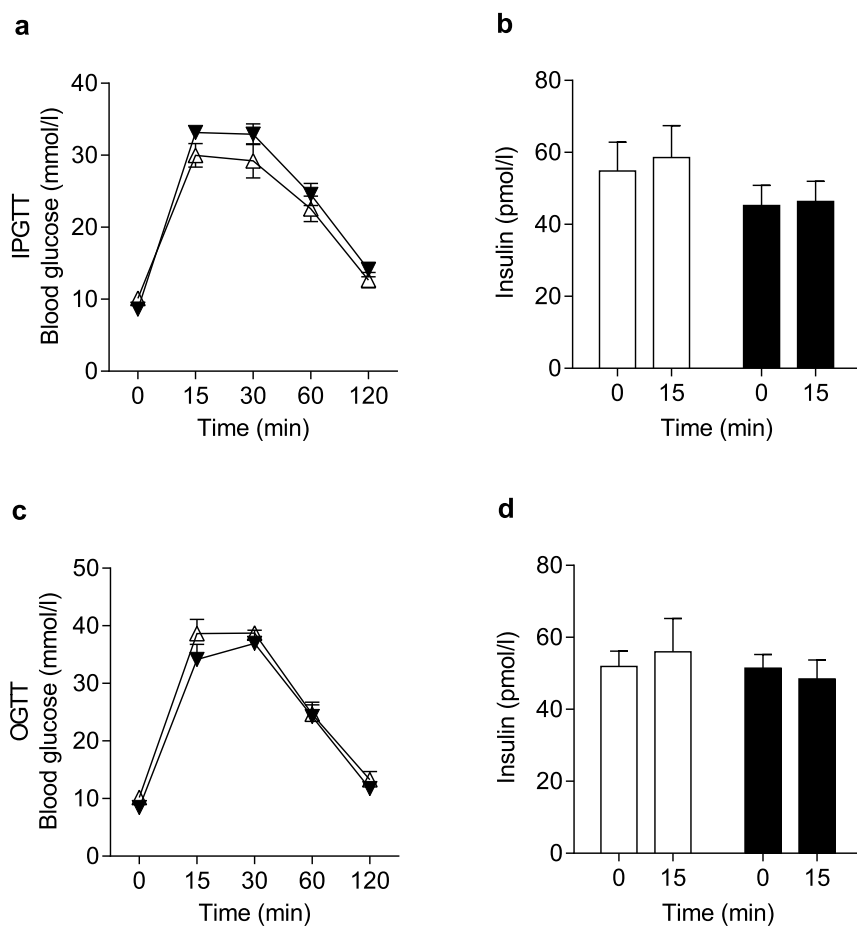

*Intraperitoneal and oral glucose tolerance test in DPP4 inhibitor and/or mSTZ-treated DKO mice*

DPP4 inhibitor was administered from one week before mSTZ injection throughout the experiment. 2g/kg BW glucose was administered intraperitoneally or orally after 16-hour fast. (a, b) IPGTT and (c, d) OGTT were performed at 6 and 8 weeks after mSTZ treatment, respectively. Plasma insulin was measured at 0 and 15 minutes (b, d). White triangles and solid line, mSTZ-treated DKO mice (mSTZ-DKO); black triangles and solid line, DPP4 inhibitor-treated mSTZ-DKO mice (mSTZ-DPP4i-DKO). White bars, mSTZ-DKO mice; black bars, mSTZ-DPP4i-DKO mice.  $n=5-6$ , mSTZ-DKO;  $n=6$ , mSTZ-DPP4i-DKO.

**ESM Fig. 5**

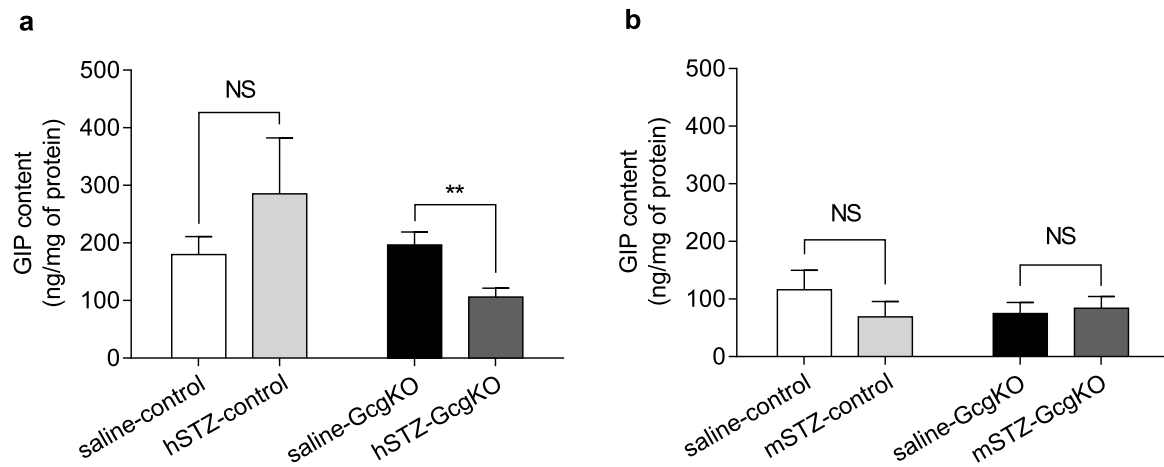

*Pancreatic GIP content in control and GcgKO mice after saline, hSTZ, or mSTZ treatment*

Pancreatic GIP content was analysed at 9 days after hSTZ treatment (**a**) or at 9 weeks after mSTZ treatment (**b**). White bars, saline-control; light grey bars, hSTZ- or mSTZ-control; black bars, saline-GcgKO; dark grey bars, hSTZ- or mSTZ-GcgKO. \*\* $p < 0.01$ ; NS, not significant. (**a**)  $n = 8$ , saline-control;  $n = 8$ , hSTZ-control;  $n = 6$ , saline-GcgKO;  $n = 6$ , hSTZ-GcgKO. (**b**)  $n = 5$ , saline-control;  $n = 6$ , mSTZ-control;  $n = 5$ , saline-GcgKO;  $n = 6$ , mSTZ-GcgKO.

ESM Fig. 6

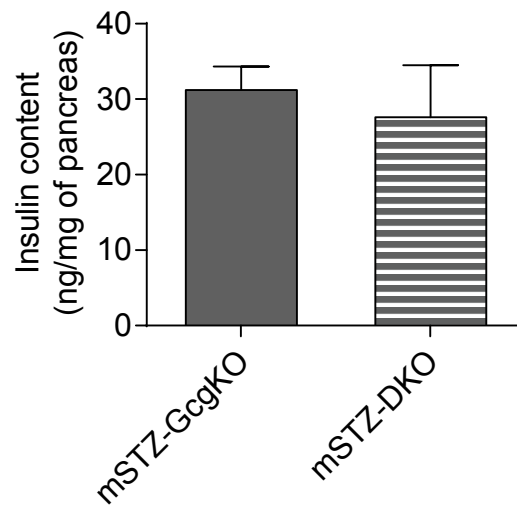

*Pancreatic insulin content in GcgKO and DKO mice.*

Pancreatic insulin content in *GcgKO* and *DKO* mice was analysed at 5 weeks after moderate-dose STZ treatment. Dark grey bars, mSTZ-*GcgKO*; horizontal-striped dark grey bars, mSTZ-*DKO*.  $n=5$ , mSTZ-*GcgKO*;  $n=6$ , mSTZ-*DKO*.
